1 **Title: Longitudinal changes in anthropometric, physiological, and physical**  
2 **qualities of international women's rugby league players.**

3 **Running title: Anthropometric, physiological, and physical qualities of**  
4 **international women's rugby league players**

5 **Authors:** Sean Scantlebury<sup>1,2</sup>, Nessian Costello<sup>1</sup>, Cameron Owen<sup>1,2</sup>, Sarah Chantler<sup>1,2</sup>,  
6 Carlos Ramirez<sup>1</sup>, Santiago Zabaloy<sup>3</sup>, Neil Collins<sup>1,2</sup> Hayden Allen<sup>1</sup>, Gemma Phillips<sup>2,4</sup>,  
7 Marina Alexander<sup>1</sup>, Matthew Barlow<sup>1</sup>, Emily Williams<sup>1</sup>, Peter Mackreth<sup>1</sup>, Stuart  
8 Barrow<sup>2</sup>, Anthony Clarke<sup>1</sup>, Benjamin Samuels<sup>1</sup>, Stephanie Roe<sup>1</sup>, Cameron Blake<sup>1</sup>, Ben  
9 Jones<sup>1,2,5,6,7</sup>

10 **Institutional Affiliations:**

11 <sup>1</sup>Carnegie School of Sports, Leeds Beckett University, Leeds, United Kingdom

12 <sup>2</sup>England Performance Unit, Rugby Football League, Manchester, United Kingdom

13 <sup>3</sup>Faculty of Physical Activity and Sports, University of Flores, Buenos Aires, Argentina

14 <sup>4</sup>Hull Kingston Rovers, Hull, United Kingdom<sup>7,8</sup> Head of Sports Science, Scotland  
15 Rugby, Edinburgh, United Kingdom

16 <sup>5</sup> Division of Physiological Sciences and Health through Physical Activity, Lifestyle  
17 and Sport Research Centre, Department of Human Biology, Faculty of Health Sciences,  
18 University of Cape Town, Cape Town, South Africa

19 <sup>6</sup> School of Behavioural and Health Sciences, Faculty of Health Sciences, Australian  
20 Catholic University, Brisbane, QLD, Australia

21 <sup>7</sup> Premiership Rugby, London, United Kingdom

22

23 **Corresponding Author:** Sean Scantlebury

24 s.scantlebury@leedsbeckett.ac.uk

25 **Abstract**

26 This is the first study to assess longitudinal changes in anthropometric, physiological,  
27 and physical qualities of international women's rugby league players. Thirteen forwards  
28 and 11 backs were tested three times over a 10-month period. Assessments included:  
29 standing height and body mass, body composition measured by dual x-ray  
30 absorptiometry (DXA), a blood panel, resting metabolic rate (RMR) assessed by  
31 indirect calorimetry, aerobic capacity (i.e.,  $\dot{V}O_2\text{max}$ ) evaluated by an incremental  
32 treadmill test, and isometric force production measured by a force plate. During the pre-  
33 season phase, lean mass increased significantly by ~2% for backs (testing point 1: 47  
34 kg; testing point 2: 48 kg) and forwards (testing point 1: 50 kg; testing point 2: 51 kg) ( $p$   
35  $= \leq 0.05$ ). Backs significantly increased their  $\dot{V}O_2\text{max}$  by 22% from testing point 1  
36 ( $40 \text{ ml}\cdot\text{kg}^{-1}\cdot\text{min}^{-1}$ ) to testing point 3 ( $49 \text{ ml}\cdot\text{kg}^{-1}\cdot\text{min}^{-1}$ ) ( $p = \leq 0.04$ ). The  $\dot{V}O_2\text{max}$  of  
37 forwards increased by 10% from testing point 1 ( $41 \text{ ml}\cdot\text{kg}^{-1}\cdot\text{min}^{-1}$ ) to testing point 3 ( $45$   
38  $\text{ml}\cdot\text{kg}^{-1}\cdot\text{min}^{-1}$ ), however this change was not significant ( $p = \geq 0.05$ ). Body mass (values  
39 represent the range of means across the three testing points) (backs: 68 kg; forwards:  
40 77-78 kg), fat mass percentage (backs: 25-26%; forwards: 30-31%), resting metabolic  
41 rate (backs:  $7 \text{ MJ}\cdot\text{day}^{-1}$ ; forwards:  $7 \text{ MJ}\cdot\text{day}^{-1}$ ), isometric mid-thigh pull (backs: 2106-  
42 2180 N; forwards: 2155-2241 N), isometric bench press (backs: 799-822 N; forwards:  
43 999-1024 N), isometric prone row (backs: 625-628 N; forwards: 667-678 N) and bloods  
44 (backs: ferritin 21-29  $\mu\text{g/L}$ , haemoglobin 137-140  $\text{g/L}$ , iron 17-21  $\mu\text{mol/L}$ , transferrin 3  
45  $\text{g/L}$ , transferrin saturation 23-28%; forwards: ferritin 31-33  $\mu\text{g/L}$ , haemoglobin 141-  
46 145  $\text{g/L}$ , iron 20-23  $\mu\text{mol/L}$ , transferrin 3  $\text{g/L}$ , transferrin saturation 26-31%) did not  
47 change ( $p = \geq 0.05$ ). This study provides novel longitudinal data which can be used to  
48 better prepare women rugby league players for the unique demands of their sport,  
49 underpinning female athlete health.

## 50 **Introduction**

51 Rugby league is a field-based team sport characterised by intermittent bouts of  
52 high-intensity actions such as sprinting, changes of direction, tackling and collisions  
53 interspersed by bouts of low-intensity activity [1–3]. These demands necessitate the  
54 development of specific physical attributes to optimise performance, support recovery,  
55 and reduce injury risk [4–6]. International women’s rugby league players have superior  
56 speed, power, and high-intensity intermittent running capabilities compared to domestic  
57 players [7]. While previous studies have reported the anthropometric and physical  
58 characteristics of international women’s rugby league players [7–9] longitudinal  
59 changes in anthropometric and physical qualities have not been reported.

60 Longitudinal changes in anthropometric and physical qualities are important, to  
61 evaluate how women’s rugby league players develop within their unique context. For  
62 example, access to training facilities and expert guidance, as well as player’s work  
63 commitments, can restrict training opportunities, thereby influencing their long-term  
64 physical development [10]. As such, there is a need to increase the evidence base in  
65 women’s rugby league [11], aligning with the identified research priority of physical  
66 performance in women’s rugby [12].

67 The longitudinal quantification of elite women’s rugby league players  
68 anthropometric, physiological, and physical attributes are needed to establish normative  
69 standards for pre- and in-season periods. These standards can be used in athlete  
70 profiling, identifying strengths and weaknesses, performance monitoring, and talent  
71 identification strategies [13]. Therefore, the aim of this study is to use valid, and reliable  
72 testing measures to quantify changes in body composition, blood markers, energy  
73 requirements, strength, and aerobic capacity of women’s international rugby league

74 players over three testing points in the lead up to the 2022 Rugby League World Cup  
75 (RLWC).

76

## 77 **Methods**

### 78 **Experimental approach to the problem**

79 This study utilised a cohort study design to establish the anthropometric,  
80 physiological, and physical characteristics of international women's rugby league  
81 players leading up to the 2022 RLWC. To achieve this, participants completed testing at  
82 three testing points; 1) December 2021: The beginning of the 2022 Women's Super  
83 League (WSL) pre-season, 2) March 2022: the end of the 2022 WSL pre-season, and 3)  
84 October 2022: following the completion of the 2022 WSL season and prior to the  
85 RLWC.

86 Data collection included anthropometric measurements (height and body mass),  
87 body composition, resting metabolic rate (RMR), blood profiling, alongside  
88 assessments of endurance capacity (maximum oxygen consumption [ $\dot{V}O_2\text{max}$ ]) and  
89 isometric strength.

90 Body composition and RMR were measured by dual-energy x-ray  
91 absorptiometry (DXA) and indirect calorimetry, respectively. Aerobic capacity was  
92 assessed through an incremental treadmill protocol, while isometric force production  
93 involved measurements of the isometric mid-thigh pull, isometric bench press, and  
94 isometric prone row via force plates.

95 A visual representation of a typical testing day is shown in Figure 1. Participants  
96 fasted until they completed the RMR assessment, DXA scan, and blood tests.  
97 Subsequently, participants were provided with a standardised breakfast consisting of  
98 overnight oats with chia seeds, stewed apple, and granola. This breakfast provided

99 approximately 524 kilocalories per portion, with a macronutrient composition of 55 g  
100 carbohydrate, 10 g of protein, and 26 g of fat. Participants consumed fluids *ab libitum*.  
101 Following breakfast, participants engaged in individual coaching and psychology  
102 workshops.

103

104 **Figure 1.** A typical testing day schedule. Dual-energy x-ray absorptiometry (DXA).  
105 Resting metabolic rate (RMR).

106

### 107 **Participants**

108 The sample size for this study was determined by the maximum squad size  
109 permitted for the 2022 RLWC. Consequently, a total of 24 women’s rugby league  
110 players were purposefully recruited. Recruitment began on the 7<sup>th</sup> of December 2021  
111 and ended on the 27<sup>th</sup> of October 2022. Participants provided written informed consent.  
112 Participants were categorised as Tier 4 “elite/international level” [14]. To be eligible for  
113 participation at each testing point, participants were required to meet the following  
114 criteria: 1) international squad registration, 2) >18 years, and 3) absence of injury or  
115 illness on the day of testing. Therefore, the final sample comprised of 24 international  
116 women’s rugby league players, with 13 classified as forwards (age:  $26.2 \pm 4.6$  years;  
117 height:  $167.4 \pm 4.1$  cm), and 11 classified as backs (age:  $26.3 \pm 5.8$  years; height:  $169.8$   
118  $\pm 4.6$  cm). Not all participants completed all tests at each testing point (Table 1).

119 Participants competed in the highest standard of the domestic women’s rugby  
120 league competition (i.e., WSL), where they regularly engaged in two to three training  
121 sessions and one match per week during the season, in addition to international training.  
122 Throughout the season, participants followed physical training programmes prescribed  
123 by the international strength and conditioning coach at their respective domestic clubs.

124 Further details regarding their annual training plan are provided in Table 2, and  
125 representative pre- and in-season weekly training microcycles are outlined in Tables 3  
126 and 4. Weekly training schedules varied among participants due to their club training,  
127 competition, and work schedules. The research ethics committee of Leeds Beckett  
128 University gave ethical approval for this work (reference number: 91130).

| Test                                         | Testing point 1<br>(n) | Testing point 2<br>(n) | Testing point 3<br>(n) |
|----------------------------------------------|------------------------|------------------------|------------------------|
| <b>Height</b>                                | 17                     | 21                     | 24                     |
| <b>Body Mass</b>                             | 17                     | 21                     | 24                     |
| <b>Blood work</b>                            | 17                     | 21                     | 24                     |
| <b>Dual-energy x-ray<br/>absorptiometry</b>  | 17                     | 21                     | 24                     |
| <b>Resting metabolic rate</b>                | 17                     | 21                     | 24                     |
| <b>Isometric mid-thigh pull</b>              | 17                     | 19                     | 24                     |
| <b>Isometric bench press</b>                 | -                      | 19                     | 24                     |
| <b>Isometric prone row</b>                   | -                      | 19                     | 24                     |
| <b>V<math>\dot{V}</math>O<sub>2</sub>max</b> | 13                     | 15                     | 21                     |

129

130 **Table 1.** The number of participants who completed each test at each testing point.

131

132

133  
134

**Table 2.** Summary of the macrocycle for an international women’s rugby league squad

| Stage of the Season  | Training Phase                           | Duration                                                                                                             | Main Objectives                                                                                                                                                                                                                                                                                                                                                                            |
|----------------------|------------------------------------------|----------------------------------------------------------------------------------------------------------------------|--------------------------------------------------------------------------------------------------------------------------------------------------------------------------------------------------------------------------------------------------------------------------------------------------------------------------------------------------------------------------------------------|
| <b>Off-Season</b>    | General preparation and conditioning     | October 2021 – January 2022<br>Frequency: 2 to 3 sessions a week.                                                    | Maintain physical qualities (e.g., speed, endurance, and strength) and recover from rugby specific training and competition.                                                                                                                                                                                                                                                               |
| <b>Pre-Season</b>    | Specific preparation and pre-competitive | January 2022 – March 2022<br>Frequency: 4 to 5 sessions a week.                                                      | Develop physical qualities (i.e., speed, endurance, and strength). Strength training sessions focused on muscular hypertrophy. Speed development was incorporated into pre-training session warmups. Endurance capacity was developed using small sided games. Conditioning sessions were prescribed via the individuals’ end velocity following the 30:15 intermittent fitness test [15]. |
| <b>In-Season</b>     | Competitive                              | March 2022 – September 2022<br>Frequency: 3 to 4 sessions a week.<br>1 weekly competition (friendly and/or official) | Continue to develop physical qualities (i.e., speed, endurance, strength, and power). Strength training sessions included max strength, strength-speed, and plyometric exercises. Speed development was incorporated into pre-training session warmups. Conditioning sessions were prescribed via the individual’s end velocity following the 30:15 intermittent fitness test.             |
| <b>Pre-World Cup</b> | Specific preparation and pre-competitive | September 2022 – October 2022<br>Frequency: 3 to 4 sessions a week.                                                  | Continue to develop physical qualities (i.e., speed, endurance, strength, and power). Strength training sessions included max strength, strength-speed, and plyometric exercises. Speed development was incorporated into pre-training session warmups. Conditioning sessions were prescribed via the individual’s end velocity following the 30:15 intermittent fitness test.             |

135

136 **Table 3.** Typical pre-season weekly training schedule of an international women’s rugby league squad

|             |                                                                                                 |                                                                                                                                                                                                                                                                                                                                                                                                                                                                                                                                                                            |             |                                                                                                                                                                                                                                                                                                                                                                                                                                                                                                                                                                                              |  |                                                                                                                                                                                                                                                                                                                                                                                                                                                                                                                                                                                                                              |
|-------------|-------------------------------------------------------------------------------------------------|----------------------------------------------------------------------------------------------------------------------------------------------------------------------------------------------------------------------------------------------------------------------------------------------------------------------------------------------------------------------------------------------------------------------------------------------------------------------------------------------------------------------------------------------------------------------------|-------------|----------------------------------------------------------------------------------------------------------------------------------------------------------------------------------------------------------------------------------------------------------------------------------------------------------------------------------------------------------------------------------------------------------------------------------------------------------------------------------------------------------------------------------------------------------------------------------------------|--|------------------------------------------------------------------------------------------------------------------------------------------------------------------------------------------------------------------------------------------------------------------------------------------------------------------------------------------------------------------------------------------------------------------------------------------------------------------------------------------------------------------------------------------------------------------------------------------------------------------------------|
|             |                                                                                                 | <p><b>TEC/TAC (60’-120’)</b><br/><i>Speed and conditioning included in tec/tac.</i></p> <p><b>Speed block (10-20’)</b><br/>Sprint mechanics<br/>Acceleration 10m to 20m<br/>(2 reps)<br/>Max velocity 40m<br/>(1-3 reps)</p> <p><b>Conditioning (20’)</b><br/>(90%-100% VIFT)<br/>15s -30s work, 15s – 30s rest<br/>2-3 sets x 8-10 reps</p> <p><b>Strength Block (60’): Hypertrophy</b><br/>Lower body<br/>Traditional exercises included (but not limited to) during the mesocycle:<br/>BS, FS, TBD, RDL, Nordics, BSS, LL, HT, CR, PR, plank, BR.<br/>(70%–80% 1RM)</p> |             | <p><b>TEC/TAC (60’-120’)</b><br/><i>Speed and conditioning included in tec/tac.</i></p> <p><b>Speed block (10-20’)</b><br/>Sprint mechanics<br/>Acceleration 10m – 20m<br/>(2 reps)<br/>Max velocity 40m<br/>(1-3 reps)</p> <p><b>Conditioning (20’)</b><br/>(90%-100% VIFT)<br/>15s -30s work, 15s – 30s rest<br/>2-3 sets x 8-10 reps</p> <p><b>Strength Block (60’) Hypertrophy</b><br/>Upper body<br/>Traditional exercises included (but not limited to) during the mesocycle:<br/>BP, SA DB row, SA DB press;<br/>Pull-ups, SA DB SP, BC, TE, PR,<br/>Dead bugs.<br/>(70%–80% 1RM)</p> |  | <p><b>TEC/TAC (60’-120’)</b><br/><i>Speed and conditioning included in tec/tac.</i></p> <p><b>Speed block (10-20’)</b><br/>Sprint mechanics<br/>Acceleration 10m – 20m<br/>(2 reps)<br/>Max velocity 40m<br/>(1-3 reps)</p> <p><b>Conditioning (20’)</b><br/>(90%-100% VIFT)<br/>15s -30s work, 15s – 30s rest<br/>2-3 sets x 8-10 reps</p> <p><b>Strength Block (60’) Hypertrophy</b><br/>Full body<br/>Traditional exercises included (but not limited to) during the mesocycle:<br/>BS, FS, RDL, Nordics, BSS, LL, HT, CR BP, SA DB row, SA DB press, SA DB SP, MP, Pull ups,<br/>Plank, Dead bugs.<br/>(70%–80% 1RM)</p> |
| <b>Rest</b> | <p><b>Conditioning (30’)</b><br/>(80% VIFT)<br/>3 mins work, 2 mins rest<br/>1 set x 6 reps</p> | <b>Rest</b>                                                                                                                                                                                                                                                                                                                                                                                                                                                                                                                                                                | <b>Rest</b> | <b>Rest</b>                                                                                                                                                                                                                                                                                                                                                                                                                                                                                                                                                                                  |  |                                                                                                                                                                                                                                                                                                                                                                                                                                                                                                                                                                                                                              |

137



138 Abbreviations: TEC/TAC, technical and tactical training; VIFT, 30:15 intermittent fitness test end speed; 1RM, 1-repetition maximum; SA, single arm; DB, dumbbell; BS, back squat; FS, front squat; TBD, trap bar  
139 deadlift; RDL, Romanian deadlift; BSS, Bulgarian split squat; LL, lateral lunge; HT, hip thrust; CR, calf raise; BP, bench press; BO row, bent-over row; SP, shoulder press; MP, military press; BC, bicep curl; TE, tricep  
140 extension; PR, Paloff rotation; BR, barbell rollout.

141 **Table 4.** Typical in-season weekly training schedule of an international women’s rugby league squad

| Sunday             | Monday | Tuesday                                                                                                                                                                                                                           | Wednesday                                                                                                                                                                                                                           | Thursday                                                                                                           | Friday                                                                                                                                                                                                                                                                | Saturday |
|--------------------|--------|-----------------------------------------------------------------------------------------------------------------------------------------------------------------------------------------------------------------------------------|-------------------------------------------------------------------------------------------------------------------------------------------------------------------------------------------------------------------------------------|--------------------------------------------------------------------------------------------------------------------|-----------------------------------------------------------------------------------------------------------------------------------------------------------------------------------------------------------------------------------------------------------------------|----------|
| <b>Competition</b> | Rest   | <b>TEC/TAC (60’-120’)</b><br><i>Speed and conditioning included in tec/tac.</i>                                                                                                                                                   | <b>Strength Block (60’):</b><br>S/PT<br>Upper body<br>Traditional exercises included (but not limited to) during the mesocycle:<br>HC, HP, PPU, SA DB row, SA DB press; Pull-ups, SA DB SP, BC, TE, PR, Dead bugs.<br>(70%–90% 1RM) | <b>TEC/TAC (60’-120’)</b><br><i>Speed and conditioning included in tec/tac.</i>                                    | <b>Strength Block (60’):</b><br>S/PT<br>Full body<br>Traditional exercises included (but not limited to) during the mesocycle:<br>HP, Jump squat, BJ, bounding, MBS, deadlift, TBD, BP, BO row, SP, pull-ups, Nordics, Isometric hamstring hold, PR.<br>(70%–90% 1RM) | Rest     |
|                    |        | <b>Speed block (10-20’)</b><br>Sprint mechanics<br>Acceleration 10m to 20m (2 reps)<br>Max velocity 40m (1-3 reps)                                                                                                                |                                                                                                                                                                                                                                     | <b>Speed block (10-20’)</b><br>Sprint mechanics<br>Acceleration 10-m – 20m (2 reps)<br>Max velocity 40m (1-3 reps) |                                                                                                                                                                                                                                                                       |          |
|                    |        | <b>Conditioning (20’)</b><br>(90%-100% VIFT)<br>15s - 30s work, 15s – 30s rest<br>2-3 sets x 8-10 reps                                                                                                                            |                                                                                                                                                                                                                                     | <b>Conditioning (20’)</b><br>(90%-100% VIFT)<br>15s -30s work, 15s – 30s rest<br>2-3 sets x 8-10 reps              |                                                                                                                                                                                                                                                                       |          |
|                    |        | <b>Strength Block (60’): S/PT</b><br>Lower body<br>Traditional exercises included (but not limited to) during the mesocycle:<br>JS, DJ, BJ, Bounding, BS, FS, TBD, RDL, Nordics, BSS, LL, HT, CR, PR, plank, BR.<br>(70%–90% 1RM) |                                                                                                                                                                                                                                     |                                                                                                                    |                                                                                                                                                                                                                                                                       |          |

142 Abbreviations: TEC/TAC, technical and tactical training; VIFT, 30:15 intermittent fitness test end speed; 1RM, 1-repetition maximum; S/PT, strength/power training; SA, single arm; DB, dumbbell; HC, hang clean;  
 143 HP, high pulls; JS, jump shrug; DJ, drop jump; BJ, box jump; MBS, med ball slam; PPU, plyometric push-up; BS, back squat; FS, front squat; TBD, trap bar deadlift; RDL, Romanian deadlift; BSS, Bulgarian split  
 144 squat; LL, lateral lunge; HT, hip thrust; CR, calf raise; BP, bench press; BO row, bent-over row; SP, shoulder press; LP, landmine press; BC, bicep curl; TE, tricep extension; PR, Paloff rotation; BR, barbell rollout.

## 145 **Procedures**

### 146 *Anthropometrics and body composition*

147 On the morning of testing, measurements of fasted body mass (SECA, model-  
148 875, Hamburg, Germany) and stature (SECA, model-213, Hamburg, Germany) were  
149 taken to the nearest 0.1 kg and 0.1 cm, following the guidelines of the International  
150 Society for the Advancement of Kinanthropometry.

151 Participants then completed a DXA scan (Lunar iDXA, GE Medical Systems,  
152 United Kingdom) following established best practice protocols [3]. The scans were  
153 conducted with participants in a euhydrated state (osmolality:  $<700 \text{ mOsmol}\cdot\text{kg}^{-1}$ ),  
154 wearing minimal clothing, and with shoes and jewellery removed. To minimise  
155 potential confounding factors, participants refrained from intensive exercise, consuming  
156 alcohol, or consuming caffeine for  $\geq 8$  hours prior the scan.

157 The GE Lunar iDXA system (GE Healthcare, Pollards Wood, Buckinghamshire;  
158 Encore software version 18) employed the OneScan functionality for performing lumbar  
159 spine (L1-L4) and dual hip (total hip and neck of femur) scans without repositioning the  
160 participants. Correct positioning was ensured by utilising the GE dual femur positioning  
161 device, which required participants to rotate both legs internally between 15 and 25  
162 degrees. Total body positioning involved centring participants on the table, with their  
163 hands at their sides, and Velcro straps used to secure their legs at the ankles. Regular  
164 quality assurance was maintained through calibration block and spine phantom  
165 assessments, which showed no observed drifts.

166 In-vivo precision (coefficient of variation, CV) for the DXA measurements  
167 conducted by the Leeds Beckett DXA unit were as follows: 0.82% for lumbar spine  
168 bone mineral density (BMD), 0.98% for total hip BMD and 1.34% for femoral neck

169 BMD. The CV for total body composition measurements were 0.99% for fat, 0.98% for  
170 fat mass, and 0.42% for lean.

171

### 172 *Resting metabolic rate*

173 Resting metabolic rate was measured using open-circuit indirect calorimetry  
174 (Cortex 3B-R3 MetaLyzer, CORTEX Biophysik GmbH, Leipzig, Germany) and a  
175 transparent ventilated hood system (Cortex Canopy System, CORTEX Biophysik  
176 GmbH, Leipzig, Germany). All measurements were conducted in accordance with  
177 established best practice protocols, including an overnight fast and abstention from  
178 alcohol, nicotine, and caffeine for a minimum of 8 hours [16].

179 Data were collected over 20 minutes, with the second 10 minutes used to  
180 calculate RMR [17], as previously described [18]. The average CV for  $V\dot{O}_2$  (oxygen  
181 consumption),  $V\dot{CO}_2$  (carbon dioxide production), and respiratory exchange ratio  
182 (RER) across the three testing points was  $10.6 \pm 3.7\%$ ,  $11.6 \pm 4.9\%$ , and  $6.4 \pm 2.7\%$ ,  
183 respectively.

184

### 185 *Blood measures*

186 Venous blood samples were collected using standardised venepuncture  
187 techniques, performed by a qualified medical practitioner. Blood samples were drawn  
188 into appropriate tubes (BD Vacutainer®, Plymouth) to conduct a full blood count and  
189 assess the iron profile of participants. For the iron profile analysis, blood samples were  
190 centrifuged at 3000 revolutions per minute for a duration of 10 minutes at a temperature  
191 of 4 degrees Celsius. Subsequently, the resulting serum was pipetted into microtubes

192 and then stored at -20 degrees Celsius to preserve it for future analysis. All blood  
193 samples were analysed together at an external laboratory (Northumbria, UK). The  
194 assessment of serum iron, ferritin and transferrin levels was carried out using  
195 standardised procedures and manufactures instructions (AU Beckman Coulter analyser).

196

### 197 *Isometric Force*

198 Prior to commencing the strength testing, which included the isometric mid-  
199 thigh pull, isometric bench-press, and isometric prone row, participants completed a  
200 standardised warm-up consisting of dynamic stretches and simple bodyweight  
201 movements such as squats, lunges, push-ups. The warm-up was overseen by a qualified  
202 strength and conditioning coach and lasted 5 minutes.

203 The isometric mid-thigh pull, was selected as a measure of global full body  
204 strength [19], and executed in a specialised adjustable rack equipped with a force plate  
205 (Kistler [family type 9260AA]). Procedures of the isometric mid-thigh pull followed  
206 previously published guidelines [20]. The height of the bar was adjusted to align with  
207 each participant's mid-thigh level, resulting in a knee angle of 125°-145° and hip flexion  
208 angle of 140°-150°. Participants completed this test twice, with a 3 minute rest between  
209 efforts [21]. To elicit maximal effort, participants were instructed to exert maximum  
210 force as quickly as possible after a 3 second countdown [21]. The highest peak vertical  
211 force recorded from the two attempts was used and expressed in Newtons (N).

212 The isometric bench press and isometric prone row were performed using  
213 specialised adjustable racks connected to a force plate (Kistler [family type 9253B])  
214 following previously published guidelines [22,23]. In the isometric bench press,  
215 participants were positioned with their back flat on the bench fitted within the rack,

216 ensuring that the bar was level with their chest. For the isometric prone row,  
217 participants lay with their chest flat on the bench within the rack, with the bar  
218 positioned at chest level. In both tests, participants were required to maintain a 90<sup>0</sup> -  
219 120<sup>0</sup> elbow angle, and the bar position was adjusted accordingly. During both the  
220 isometric bench press and isometric prone row, participants were instructed to exert  
221 maximum force as rapidly as possible. Two attempts were recorded for each test, with a  
222 3-minute rest period between trials. Verbal encouragement was provided during each  
223 attempt. The highest peak vertical force recorded from the two attempts was used and  
224 expressed in Newtons (N). Notably, the isometric bench press and isometric prone row  
225 were not completed during testing point 1 due to equipment failure.

226

### 227 *Aerobic capacity*

228 Maximal oxygen uptake was determined through a running-based incremental  
229 ramp exercise test conducted on a slat-belt treadmill (Woodway ELG, Woodway,  
230 Birmingham, UK). The test protocol began with 3 minutes of walking at 3 km/h,  
231 followed by an initial running speed of 7 km/h. The running speed increased by 1 km/h  
232 every minute until the participants reached volitional exhaustion. The treadmill was set  
233 to a 1% incline throughout the test.

234 Pulmonary gaseous exchange was assessed using online, breath-by-breath gas  
235 measurement (Metalyzer 3B; Cortex Medical, Germany). Prior to the test, a two-point  
236 calibration of the gas analyser was performed in accordance with the manufacturer's  
237 guidelines. The calibration of the O<sub>2</sub> and CO<sub>2</sub> analysers was executed using ambient air  
238 and a known calibration gas (15.00 % O<sub>2</sub>, 5.00 % CO<sub>2</sub>) (Cortex Medical, Germany). A

239 3 L calibration syringe (Hans Rudolph, Kansas, USA) was employed for the calibration  
240 of the volume transducer.

241 To measure heart rate responses during exercise, a Bluetooth heart rate strap  
242 (Polar H10; Polar, Finland) was utilised. The highest 30 second average  $\dot{V}\text{O}_2$  value  
243 attained during the incremental ramp test was selected as the criterion for determining  
244 the participant's  $\dot{V}\text{O}_{2\text{max}}$ .

245

## 246 **Statistical analysis**

247 All statistical analyses were conducted using RStudio (V 4.2.0, RStudio, Boston, MA,  
248 USA). Estimated means (*emmeans*) [24] were determined for each testing point using  
249 mixed models (*lme4*) [25]. The characteristic of interest served as the dependent  
250 variable, while testing point was included as a fixed effect, with player considered as a  
251 random effect. When examining differences between player positions (forwards and  
252 backs), position was added as a fixed effect, and an interaction term was incorporated  
253 into the model. Model assumptions were assessed using the *performance* package [26].  
254 An outlier exceeding 1200 N was removed from the prone row data prior to modelling.

255 Ferritin and transferrin saturation were identified as log normal in distribution;  
256 therefore, outcomes were log transformed before analysis, and the results were back-  
257 transformed for reporting. Body fat percentage was modelled using a beta distribution,  
258 considering its values range between 0 and 1. Post-hoc comparisons were made between  
259 player positions and testing timepoints, with a significance level set as  $\alpha = 0.05$ .  
260 Means and 95% confidence intervals (95% CI) were reported, along with effect sizes  
261 and rate ratios where appropriate.

262 **Results**

263 *Anthropometrics and body composition*

264 Table 5 displays the mean (95% confidence intervals) for body mass, lean mass,  
265 fat mass, and body fat % for backs and forwards during the three testing points. Backs  
266 had a significantly lower body mass and body fat % than forwards across all three  
267 testing points ( $p \leq 0.04$ ). Backs and forwards had a significant increase in lean mass  
268 from testing point 1 to testing point 2 (backs:  $\Delta 1.1$  kg; forwards:  $\Delta 0.9$  kg;  $p \leq 0.02$ ).  
269 There were no other significant changes in body composition across testing points.

270

271 *Energy requirements*

272 The RMR (range of means across the three testing points) for backs (6.53 – 7.07  
273 MJ·day<sup>-1</sup>) and forwards (6.55 – 7.04 MJ·day<sup>-1</sup>) did not significantly differ at testing  
274 points 1 ( $p = 0.87$ ), 2 ( $p = 0.25$ ), or 3 ( $p = 0.95$ ). There was no significant difference in  
275 RMR within forwards or backs across testing points (backs:  $p \geq 0.22$ , forwards:  $p \geq$   
276 0.11; Table 5).

277



278 **Table 5.** The mean (95% CI) for body composition, energy requirements, blood measures, endurance capacity, and isometric strength of backs  
 279 and forwards across the three testing points.

|                            |                                                               | Backs                                 |                                       |                                       | Forward                              |                            |                          |
|----------------------------|---------------------------------------------------------------|---------------------------------------|---------------------------------------|---------------------------------------|--------------------------------------|----------------------------|--------------------------|
|                            |                                                               | Testing point 1                       | Testing point 2                       | Testing point 3                       | Testing point 1                      | Testing point 2            | Testing point 3          |
| <b>Body composition</b>    | Body Mass (kg)                                                | 68 <sup>^</sup><br>(62 - 73)          | 68 <sup>^</sup><br>(63 - 74)          | 68 <sup>^</sup><br>(63 - 74)          | 77<br>(71 - 82)                      | 78<br>(72 - 83)            | 77<br>(72 - 82)          |
|                            | Lean Mass (g)                                                 | 47170 <sup>*</sup><br>(43985 - 50354) | 48314<br>(45149 - 51478)              | 47916<br>(44761 - 51071)              | 50411 <sup>*</sup><br>(4703 - 53320) | 51333<br>(48428 - 54238)   | 50883<br>(47981 - 53784) |
|                            | Fat Mass (g)                                                  | 17405 <sup>^</sup><br>(13880 - 20930) | 17053 <sup>^</sup><br>(13593 - 20513) | 17127 <sup>^</sup><br>(13698 - 20555) | 22945<br>(19770 - 26119)             | 23077<br>(19912.2-26241.5) | 22866<br>(19712 - 26019) |
|                            | Body Fat (%)                                                  | 26 <sup>^</sup><br>(24 - 20)          | 25 <sup>^</sup><br>(23 - 28)          | 26 <sup>^</sup><br>(23 - 29)          | 31<br>(28 - 34)                      | 31<br>(28 - 33)            | 30<br>(28 - 33)          |
| <b>Energy Requirements</b> | RMR (MJ·day <sup>-1</sup> )                                   | 7.07<br>(6.44 - 7.70)                 | 6.61<br>(6.05 - 7.17)                 | 6.53<br>(6.04 - 7.02)                 | 7.01<br>(6.52 - 7.49)                | 7.04<br>(6.57 - 7.51)      | 6.55<br>(6.10 - 7.00)    |
| <b>Blood work</b>          | Ferritin (ug/L)                                               | 29<br>(19 - 45)                       | 21<br>(14 - 32)                       | 25<br>(17 - 37)                       | 32<br>(22 - 47)                      | 33<br>(22.6-46.9)          | 31<br>(21.6-44.8)        |
|                            | HB (g/L)                                                      | 140<br>(135-146)                      | 139<br>(134-144)                      | 137<br>(133 - 141)                    | 143<br>(139 - 147)                   | 141<br>(137-145)           | 145<br>(138-145)         |
|                            | Iron (umol/L)                                                 | 21<br>(15 - 27)                       | 18<br>(13 - 24)                       | 17<br>(12 - 21)                       | 23<br>(19 - 27)                      | 22<br>(17 - 26)            | 20<br>(15 - 24)          |
|                            | TRF (g/L)                                                     | 3<br>(2 - 3)                          | 3<br>(2 - 3)                          | 3<br>(2 - 3)                          | 3<br>(2-3)                           | 3<br>(2 - 3)               | 3<br>(2 - 3)             |
|                            | TRS Sat (%)                                                   | 28<br>(20 - 39)                       | 23<br>(17 - 31)                       | 24<br>(19 - 31)                       | 31<br>(24 - 39)                      | 28<br>(22-36)              | 26<br>(20 - 33)          |
| <b>Aerobic Capacity</b>    | V̇O <sub>2max</sub> (ml·kg <sup>-1</sup> ·min <sup>-1</sup> ) | 40 <sup>*#</sup><br>(36 - 44)         | 45<br>(42 - 49)                       | 49<br>(46 - 52)                       | 41<br>(38 - 45)                      | 42<br>(39 - 45)            | 45<br>(42 - 48)          |
| <b>Force Production</b>    | Isometric Mid-Thigh Pull (n)                                  | 2175<br>(2029 - 2322)                 | 2180<br>(2037 - 2323)                 | 2106<br>(1976 - 2237)                 | 2155<br>(2032 - 2278)                | 2212<br>(2091 - 2335)      | 2241<br>(2121 - 2361)    |
|                            | Isometric Bench Press (n)                                     | -                                     | 822 <sup>^</sup><br>(668 - 978)       | 799 <sup>^</sup><br>(655 - 925)       | -                                    | 1024<br>(987 - 1151)       | 999<br>(874 - 1123)      |
|                            | Isometric Prone Row (n)                                       | -                                     | 628<br>(553 - 702)                    | 625<br>(553 - 697)                    | -                                    | 678<br>(611 - 745)         | 667<br>(601 - 733)       |

280 Significance: p≤0.05, \*significantly different to testing point 2, #significantly different to testing point 3, ^significantly different to forwards.

281 Kg – Kilograms, g – grams, % - percentage, n – newtons, N, ml·kg<sup>-1</sup>·min<sup>-1</sup> – Millilitres per kilogram per minute, HB – haemoglobin, TRF – transferrin, TRS Sat – transferrin saturation

282 *Blood markers*

283 Mean ferritin (backs: 21 – 28ug/L; forwards: 31 – 33ug/L), haemoglobin (backs:  
284 137 – 140g/L; forwards: 141 – 145g/L), iron (backs: 17 – 21umol/L; forwards: 20 –  
285 23umol/L), transferrin (backs: 3g/L; forwards: 3g/L), and transferrin saturation (backs:  
286 23 – 28%; forwards: 26 – 31%), did not significantly differ between forwards and backs  
287 ( $p \geq 0.11$ ) and did not significantly change across testing points ( $p \geq 0.07$ ) (Table 5).

288

289 *Aerobic capacity*

290 The mean  $\dot{V}O_{2max}$  for backs displayed a significant increase, rising from  
291  $40\text{ml}\cdot\text{kg}^{-1}\cdot\text{min}^{-1}$  at testing point 1 to  $45\text{ml}\cdot\text{kg}^{-1}\cdot\text{min}^{-1}$  at testing point 2 and further to  
292  $49\text{ml}\cdot\text{kg}^{-1}\cdot\text{min}^{-1}$  at testing point 3 ( $p \leq 0.04$ ). The mean  $\dot{V}O_{2max}$  for forwards increased  
293 from  $41\text{ml}\cdot\text{kg}^{-1}\cdot\text{min}^{-1}$  at testing point 1 to  $42\text{ml}\cdot\text{kg}^{-1}\cdot\text{min}^{-1}$  at testing point 2 and to  
294  $45\text{ml}\cdot\text{kg}^{-1}\cdot\text{min}^{-1}$  at testing point 3 however these changes were not significant ( $p \geq 0.05$ ).  
295  $\dot{V}O_{2max}$  did not differ between forwards and backs ( $p \geq 0.07$ ) (Table 5).

296

297 *Isometric Force Production*

298 The mean isometric mid-thigh pull scores showed no significant differences  
299 between backs (2106 – 2180 N) and forwards (2155 – 2241 N) ( $p \geq 0.13$ ). Forwards  
300 exhibited greater isometric bench press scores at testing points 2 (forwards: 1024 N;  
301 backs: 822 N) and 3 (forwards: 999 N; backs: 799 N) ( $p \leq 0.05$ ). There were no  
302 significant differences in isometric prone row scores between backs and forwards  
303 (backs: 625 – 628 N; forwards 667 – 678 N) ( $p \geq 0.31$ ). Strength scores did not  
304 significantly change across testing points ( $p \geq 0.09$ ) (Table 5).

305

306

## 307 **Discussion**

308           This is the first study to provide longitudinal changes specific to player positions  
309 for a range of anthropometric, physiological, and physical characteristics in  
310 international women's rugby league players. Notably, increases in lean mass were  
311 observed during the pre-season (from testing point 1 to testing point 2), and backs  
312 demonstrated improvements in  $\dot{V}\text{O}_{2\text{max}}$  across the three testing points. Conversely, no  
313 significant changes were observed in fat mass, RMR, blood markers, or strength over  
314 time. Importantly, the call to better support female rugby league players through  
315 research [11] is addressed in this study. The novel longitudinal data presented  
316 supplements the existing evidence base and provides important information which may  
317 be used to profile and better support international women's rugby league players in  
318 practice.

319           Consistent with previous literature in women's rugby league players, this study  
320 confirms that forwards tend to have greater body mass and body fat percentages  
321 compared to backs, with no significant differences in lean mass [7–9]. Interestingly,  
322 both backs and forwards exhibited an increase in lean mass from testing point 1 to  
323 testing point 2, aligning with the training programme's emphasis on muscular  
324 hypertrophy during this phase. However, there were no significant changes observed in  
325 body mass or fat mass across the three testing points. It is worth noting that, when  
326 compared to data from 2014 [8], the average lean mass of English international backs  
327 increased by 3.8 kg, and forwards by 1.6 kg. In contrast, Australian backs (53.3 kg) and  
328 forwards (60.1 kg) have greater fat-free mass and a lower fat mass percentage (backs:  
329 20.3 %, forwards: 23.9 %) than their English counterparts. We acknowledge that  
330 differences in positional classifications, such as the categorisation of hookers, locks, and  
331 half-backs, may have influenced these comparisons. However, given the recognised

332 positive association between body mass, sprint momentum and collision dominance in  
333 female rugby [6] it is imperative to focus on developing the lean mass of international  
334 women's rugby league players to improve their performance.

335 This study provides a criterion assessed RMR data for women's senior  
336 international rugby players for the first time. Measured RMR closely align with the  
337 mean values reported for a combined sample of female elite (n=18) and sub-elite (n=18)  
338 rugby players in Ireland [27], differing by only  $0.16 \text{ MJ}\cdot\text{day}^{-1}$ . However, it is noteworthy  
339 that the RMR values observed in this study are  $\sim 1.06 \text{ MJ}\cdot\text{day}^{-1}$  and  $\sim 3.24 \text{ MJ}\cdot\text{day}^{-1}$  lower  
340 than those reported for male senior professional rugby league and rugby union players  
341 in the English Super League [28] and Premiership [29], respectively. Furthermore,  
342 there were no significant differences in RMR across player positions (forwards vs.  
343 backs;  $0.07 \pm 0.87 \text{ MJ}\cdot\text{day}^{-1}$ ) or testing points ( $-0.13 \pm 1.03 \text{ MJ}\cdot\text{day}^{-1}$ ).

344 Based on doubly labelled water-assessed energy expenditure data from our own  
345 laboratory, senior women's international rugby union players have a mean in-season  
346 physical activity level of 2.0 arbitrary units (AU) (range: 1.6 - 2.3 AU; Wilson et al.,  
347 *unpublished observations*). When considering the mean RMR of  $6.74 \text{ MJ}\cdot\text{day}^{-1}$   
348 measured in this study, the calculated total energy expenditure for a 73 kg women's  
349 international rugby player is  $\sim 13.48 \text{ MJ}\cdot\text{day}^{-1}$  (range:  $10.78 - 15.50 \text{ MJ}\cdot\text{day}^{-1}$ ; 73 kg is  
350 the average body mass of players in this study). Following established sport nutrition  
351 guidelines (protein: 1.6 - 2.0 gBM; fat: 20 - 35% of total energy expenditure) [30], this  
352 would allow for a daily dietary carbohydrate intake of  $6.33 - 8.84 \text{ MJ}\cdot\text{day}^{-1}$  to achieve  
353 energy balance (equivalent to 378 - 528 g or 5.2 - 7.2 gBM of carbohydrate). Notably,  
354 female rugby players will need to consistently consume in excess of these values to  
355 achieve a positive energy balance associated with targeted increases in lean mass or

356 overall body mass [30]. These findings now provide a valuable evidence base to support  
357 improved dietary intakes for female rugby players.

358 While iron profiles represented by blood measures did not show any statistical  
359 differences between player positions or testing points, it is notable that the mean ferritin  
360 levels remained consistently below the threshold for stage one iron deficiency (<35  
361 ug/L) across all testing points [31]. Although not statistically significant, there was a  
362 trend towards decreases in ferritin levels from testing point 1 to testing point 2,  
363 particularly amongst backs. This trend was further emphasised by the classification of  
364 eleven players as stage 2 iron-deficient non-anaemia (Ferritin <20 ug/L) at different  
365 testing points. The observed changes in ferritin levels may be indicative of the  
366 increasing intensity of the training program and of the modest increases in lean mass  
367 observed during the pre-season period, a pattern consistent with the changes seen in  
368 female combat trainees over a 16 week basic combat training program [32]. Ferritin,  
369 unlike serum iron and transferrin saturation, tends to remain stable throughout the  
370 menstrual cycle [33], suggesting its specific role in capturing specific changes due to  
371 training load.

372 All players reported eumenorrhea at testing point 2, with a third (7 players)  
373 using hormonal contraceptives. While low iron stores, as approximated from ferritin  
374 levels, may compromise aerobic capacity or adaptations to training, the impact on lean  
375 mass remains unclear [34,35]. These findings advocate for the inclusion of full iron  
376 profiles, rather than relying solely on haemoglobin levels, in the performance program  
377 for female rugby players. The evidence strongly supports iron supplementation once  
378 ferritin levels drop below 20 ug/L [36], and dietary support to meet iron intakes  
379 requirements should be considered for players during intense training periods such as  
380 pre-season in this study.

381 Measures of force production, including isometric mid-thigh pull and prone row,  
382 showed no significant differences between forwards and backs, while forwards  
383 demonstrated greater bench press peak force. Peak force remained stable across the  
384 three testing points. Research in elite male rugby league players highlighted that pre-  
385 season improvements in lower body strength were linked to lifting heavier loads (>80%  
386 1RM;) [37]. In contrast, this study's pre-season training emphasized muscular  
387 hypertrophy with lighter loads (8-12 repetitions at 70-80% 1RM), possibly explaining  
388 why isometric mid-thigh pull peak force did not increase alongside lean mass. Rugby  
389 league's multifaceted demands necessitate simultaneous development of various  
390 physical characteristics (e.g., strength, speed, and endurance), but concurrent training  
391 across modalities can sometimes limit strength gains [38]. Here, isometric peak force  
392 improvements were largely maintained rather than improved during the in-season  
393 period, in line with prior findings [37]. Comparing these results with previous research,  
394 the mean isometric mid-thigh pull peak force for Australian women's backs (+369 N)  
395 and forwards (+515 N) surpassed the values found for backs and forwards in this study  
396 [9]. Maximal strength is a pivotal determinant of successful rugby league performance,  
397 correlating with improved technical skill, greater match-play distances covered,  
398 enhanced sprint performance, and higher playing standards [37,39]. Hence, prioritising  
399 maximal strength development during the pre-season period is crucial, as this phase  
400 often yields more noticeable strength improvements compared to the in-season phase  
401 [37].

402 Aerobic capacity analysis revealed no significant differences between backs and  
403 forwards, but a large disparity in their  $\dot{V}\text{O}_{2\text{max}}$  improvements (backs: +22.5%  
404 forwards: +10%). It's important to note that a scarcity of research in female sports,  
405 particularly those studying longitudinal changes, hinders a direct comparison to the

406  $\dot{V}\text{O}_{2\text{max}}$  values documented in this study. Minahan et al., [9] estimated the  $\dot{V}\text{O}_{2\text{max}}$  of  
407 the Australian RL squad using a prediction equation based on their 30:15 intermittent  
408 fitness test score. The average  $\dot{V}\text{O}_{2\text{max}}$  for English backs (+1.8 ml·kg<sup>-1</sup>·min<sup>-1</sup>) and  
409 forwards (+2.1 ml·kg<sup>-1</sup>·min<sup>-1</sup>) surpassed that of their Australian counterparts. Given the  
410 demands of rugby league match-play, where players must manage repeated high-  
411 intensity efforts and prolonged periods of play, a well-developed aerobic capacity is  
412 essential [3,40]. This study shows that aerobic capacity can be developed during both  
413 pre-season and in-season periods, however, it may come at the cost of restricting the  
414 concurrent development of other critical anthropometric and physical qualities, such as  
415 lean mass and muscular strength.

416

#### 417 **Limitations and strengths**

418 Participants in this study were selected to be part of an international Rugby  
419 League World Cup squad, limiting recruitment to 24 participants. While the participant  
420 recruitment criteria ensured a high-quality sample of international standard athletes, it  
421 also imposes constraints on the study's statistical power and the generalisability of  
422 findings to the broader women's rugby league population. Moreover, it is important to  
423 acknowledge the absence of dynamic strength-power measures (e.g., 1-repetition  
424 maximum in the squat, vertical jumps) and sprint tests. Despite these limitations, which  
425 are common in applied research [41], this study also has several strengths. For example,  
426 this study utilised several criterion methods (i.e., indirect calorimetry and lab based  
427  $\dot{V}\text{O}_{2\text{max}}$  testing), while also evaluating critical elements of female athlete health (e.g.,  
428 energy requirements and micronutrient status). As such, practitioners now have an  
429 enhanced evidence base to support athlete-centred interventions within practice.

430

## 431 **Conclusion**

432           During the pre-season period, both forwards and backs exhibited increases in  
433 lean mass, while backs demonstrated significant improvements in  $V\dot{O}_2\text{max}$  across all  
434 testing points. However, no significant changes were observed in body mass, fat mass,  
435 body fat percentage, energy requirements, blood markers, or strength measures. The  
436 findings of this study contribute valuable position-specific normative data  
437 encompassing body composition, energy requirements, blood profiles, strength, and  
438 aerobic capacity for senior female rugby league players. These insights fill critical gaps  
439 in the existing evidence base and provide practitioners with knowledge to inform  
440 training strategies and better prepare women's rugby league players for the unique  
441 demands of their sport.

442

## 443 **Practical applications**

444           The findings of this study offer practitioners normative values when assessing  
445 the unique characteristics of women's rugby league players, enabling a more precise  
446 and individualised approach to training and preparation. By analysing anthropometric,  
447 physiological, and physical traits, practitioners can identify position-specific strengths  
448 and weaknesses, providing insights for tailored training programs that align with the  
449 demands of women's rugby league. Furthermore, the inclusion of iron profile  
450 monitoring, especially during intensified training phases, can contribute to players'  
451 overall health and performance. The proposed energy and macronutrient reference  
452 values (energy: 0.14-21 MJ $\text{kg}^{-1}$ ; carbohydrate: 5.2-7.2 g $\text{BM}$ ; protein: 1.6 g $\text{BM}$ ; fat 20-  
453 35% of total energy expenditure), equips practitioners with the means to optimise  
454 players' nutritional strategies, enhance body composition, and better prepare them for  
455 training and competition.



456

## 457 **Acknowledgements**

458 The authors would like to thank the Rugby Football League and the England  
459 Performance Unit for supporting this study.

460

## 461 **References**

- 462 1. Emmonds S, Weaving D, Dalton-Barron N, Rennie G, Hunwicks R, Tee J, et al.  
463 Locomotor characteristics of the women's inaugural super league competition  
464 and the rugby league world cup. *J Sports Sci.* 2020; 1–8.  
465 doi:10.1080/02640414.2020.1790815
- 466 2. Quinn K, Newans T, Buxton S, Thomson T, Tyler R, Minahan C. Movement  
467 patterns of players in the Australian Women's Rugby League team during  
468 international competition. *J Sci Med Sport.* 2020;23: 315–319.  
469 doi:10.1016/j.jsams.2019.10.009
- 470 3. Jones B, Emmonds S, Hind K, Nicholson G, Rutherford Z, Till K. Physical  
471 Qualities of International Female Rugby League Players by Playing Position. *J*  
472 *strength Cond Res.* 2016;30: 1333–1340. doi:10.1519/JSC.0000000000001225
- 473 4. Gabbett TJ, Ullah S, Finch CF. Identifying risk factors for contact injury in  
474 professional rugby league players - Application of a frailty model for recurrent  
475 injury. *J Sci Med Sport.* 2012;15: 496–504. doi:10.1016/j.jsams.2012.03.017
- 476 5. Johnston RD, Gabbett TJ, Jenkins DG, Hulin BT. Influence of physical qualities  
477 on post-match fatigue in rugby league players. *J Sci Med Sport.* 2015;18: 209–  
478 213. doi:10.1016/j.jsams.2014.01.009
- 479 6. Woodhouse LN, Bennett M, Tallent J, Patterson SD, Waldron M. The  
480 relationship between physical characteristics and match collision performance  
481 among elite international female rugby union players. *Eur J Sport Sci.* 2022;23:  
482 1849-1858 doi:10.1080/17461391.2022.2144765
- 483 7. Scantlebury S, McCormack S, Sawczuk T, Emmonds S, Collins N, Beech J, et al.  
484 The anthropometric and physical qualities of women's rugby league Super  
485 League and international players; identifying differences in playing position and  
486 level. *PLoS One.* 2022;17: 1–13. doi:10.1371/journal.pone.0249803
- 487 8. Jones B, Emmonds S, Hind K, Nicholson G, Rutherford Z, Till K. Physical

- 488 qualities of international female rugby league players by playing position. J  
489 Strength Cond Res. 2016;30: 1333–1340.
- 490 9. Minahan C, Newans T, Quinn K, Parsonage J, Buxton S, Bellinger P. Strong,  
491 fast, fit, lean, and safe: A positional comparison of physical and physiological  
492 qualities within the 2020 Australian women’s Rugby league team. J Strength  
493 Cond Res. 2021;35: S11–S19. doi:10.1519/JSC.0000000000004106
- 494 10. Scantlebury S, Ramirez C, Cummins C, Stokes K, Tee J, Minahan C, et al. Injury  
495 risk factors and barriers to their mitigation for women playing rugby league: A  
496 Delphi study. J Sports Sci. 2022;40:1436-1449
- 497 11. Cummins C, Melinz J, King D, Sanctuary C, Murphy A. Call to action: a  
498 collaborative framework to better support female rugby league players. British  
499 journal of sports medicine. 2020. pp. 501–502. doi:10.1136/bjsports-2019-  
500 101403
- 501 12. Heyward O, Emmonds S, Roe G, Scantlebury S, Stokes K, Jones B. Applied  
502 sports science and sports medicine in women’s rugby: systematic scoping review  
503 and Delphi study to establish future research priorities. BMJ Open Sport Exerc  
504 Med. 2022;8: 1–18. doi:10.1136/bmjsem-2021-001287
- 505 13. Weakley J, Black G, McLaren S, Scantlebury S, Suchomel TJ, McMahon E, et  
506 al. Testing and Profiling Athletes: Recommendations for Test Selection,  
507 Implementation, and Maximizing Information. Strength Cond J. 2023;Publish  
508 Ah: 1–21. doi:10.1519/ssc.0000000000000784
- 509 14. McKay AKA, Stellingwerff T, Smith ES, Martin DT, Mujika I, Goosey-Tolfrey  
510 VL, et al. Defining Training and Performance Caliber: A Participant  
511 Classification Framework. Int J Sports Physiol Perform. 2022;17: 317–331.  
512 doi:10.1123/ijsp.2021-0451
- 513 15. Buchheit M. The 30-15 Intermittent Fitness Test: a new intermittent running field  
514 test for intermittent sport players-Part 1. Approach du Handball. 2005;87: 27–34.
- 515 16. Fullmer S, Benson-Davies S, Earthman CP, Frankenfield DC, Gradwell E, Lee  
516 PSP, et al. Evidence Analysis Library Review of Best Practices for Performing  
517 Indirect Calorimetry in Healthy and Non-Critically Ill Individuals. J Acad Nutr  
518 Diet. 2015;115: 1417-1446.e2. doi:10.1016/j.jand.2015.04.003
- 519 17. Iraki J, Paulsen G, Garthe I, Slater G, Areta JL. Reliability of resting metabolic  
520 rate between and within day measurements using the Vyntus CPX system and  
521 comparison against predictive formulas. Nutr Health. 2023;29: 107–114.

- 522 doi:10.1177/02601060211057324
- 523 18. Costello N, Deighton K, Preston T, Matu J, Rowe J, Jones B. Are professional  
524 young rugby league players eating enough? Energy intake, expenditure and  
525 balance during a pre-season. *Eur J Sport Sci.* 2019;19: 123–132.  
526 doi:10.1080/17461391.2018.1527950
- 527 19. Fernandes JFT, Daniels M, Myler L, Twist C. Influence of playing standard on  
528 upper- and lower-body strength, power, and velocity characteristics of elite rugby  
529 league players. *J Funct Morphol Kinesiol.* 2019;4. doi:10.3390/jfmk4020022
- 530 20. Comfort P, Dos’ Santos T, Beckham GK, Stone MH, Guppy SN, Haff GG.  
531 Standardization and Methodological Considerations for the Isometric Midthigh  
532 Pull. *Strength Cond J.* 2019;41: 57–79. doi:10.1519/SSC.0000000000000433
- 533 21. Haff G, Carlock J, Hartman M, Kilgore J, Kawamori N, Jackson J, et al. Force-  
534 Time curve characteristics of dynamic and isometric muscle actions of elite  
535 women olympic weightlifters. *J Strength Cond Res.* 2005;19: 741–748.
- 536 22. Lum D, Aziz L. Validity and Reliability of the Isometric Prone Bench Pull Test.  
537 *Int J Sports Med.* 2020;41: 520–527. doi:10.1055/a-1103-2173
- 538 23. Murphy A, Wilson G, Pryor J, Newton R. Isometric Assessment of Muscular  
539 Function: The Effect of Joint Angle. *J Appl Biomech.* 1995;11: 205–215.
- 540 24. Lenth R. `_emmeans: Estimated Marginal Means, aka Least-Squares Means_` (R  
541 Package version 1.8.7) [Computer software]. 2023.
- 542 25. Bates D, Mächler M, Bolker BM, Walker SC. Fitting linear mixed-effects models  
543 using lme4. *J Stat Softw.* 2015;67. doi:10.18637/jss.v067.i01
- 544 26. Lüdtke D, Ben-Shachar M, Patil I, Waggoner P, Makowski D. performance: An  
545 R Package for Assessment, Comparison and Testing of Statistical Models. *J*  
546 *Open Source Softw.* 2021;6: 3139. doi:10.21105/joss.03139
- 547 27. O’Neill JERG, Walsh CS, McNulty SJ, Gantly HC, Corish ME, Crognale D, et  
548 al. Resting Metabolic Rate in Female Rugby Players: Differences in Measured  
549 Versus Predicted Values. *J strength Cond Res.* 2020; 36: 845-850.  
550 doi:10.1519/JSC.0000000000003634
- 551 28. Morehen J, Bradley W, Clarke J, Twist C, Hambly C, Speakman J, et al. The  
552 assessment of total energy expenditure during a 14-day ‘in-season’ period of  
553 professional rugby league players using the Doubly Labelled Water method. *Int J*  
554 *Sport Nutr Exerc Metab.* 2016;26: 464–472.
- 555 29. Hudson JF, Phelan MM, Owens DJ, Morton JP, Close GL, Stewart CE. “Fuel for

- 556 the Damage Induced”: Untargeted Metabolomics in Elite Rugby Union Match  
557 Play. *Metabolites*. 2021;11: 544. doi:10.3390/metabo11080544
- 558 30. Thomas DT, Burke LM, Erdman KA. Nutrition and Athletic Performance. *Med*  
559 *Sci Sports Exerc*. 2016;48: 543–568. doi:10.1249/MSS.0000000000000852
- 560 31. Sim M, Garvican-Lewis LA, Cox GR, Govus A, McKay AKA, Stellingwerff T,  
561 et al. Iron considerations for the athlete: a narrative review. *Eur J Appl Physiol*.  
562 2019;119: 1463–1478. doi:10.1007/s00421-019-04157-y
- 563 32. Martin NM, Conlon CA, Smeele RJM, Mugridge OAR, Von Hurst PR, McClung  
564 JP, et al. Iron status and associations with physical performance during basic  
565 combat training in female New Zealand Army recruits. *Br J Nutr*. 2019;121:  
566 887–893. doi:10.1017/S0007114519000199
- 567 33. Badenhorst CE, Forsyth AK, Govus AD. A contemporary understanding of iron  
568 metabolism in active premenopausal females. *Front Sport Act Living*. 2022;4:  
569 903937. doi:10.3389/fspor.2022.903937
- 570 34. Shoemaker ME, Salmon OF, Smith CM, Duarte-Gardea MO, Cramer JT.  
571 Influences of Vitamin D and Iron Status on Skeletal Muscle Health: A Narrative  
572 Review. *Nutrients*. 2022;14: 1–34. doi:10.3390/nu14132717
- 573 35. Colenso-Semple LM, D’Souza AC, Elliott-Sale KJ, Phillips SM. Current  
574 evidence shows no influence of women’s menstrual cycle phase on acute strength  
575 performance or adaptations to resistance exercise training. *Front Sport Act*  
576 *Living*. 2023;5: 1054542. doi:10.3389/fspor.2023.1054542
- 577 36. Rubeor A, Goojha C, Manning J, White J. Does Iron Supplementation Improve  
578 Performance in Iron-Deficient Nonanemic Athletes? *Sports Health*. 2018;10:  
579 400–405. doi:10.1177/1941738118777488
- 580 37. Redman KJ, Kelly VG, Beckman EM. Seasonal changes in strength and power in  
581 elite rugby league: A systematic review and meta-analysis. *J Sport Sci Med*.  
582 2021;20: 721–731. doi:10.52082/jssm.2021.721
- 583 38. Vechin FC, Conceição MS, Telles GD, Libardi CA, Ugrinowitsch C. Interference  
584 Phenomenon with Concurrent Strength and High-Intensity Interval Training-  
585 Based Aerobic Training: An Updated Model. *Sport Med*. 2021;51: 599–605.  
586 doi:10.1007/s40279-020-01421-6
- 587 39. Johnston RD, Gabbett TJ, Jenkins DG. Applied sport science of rugby league.  
588 *Sport Med*. 2014;44: 1087–1100. doi:10.1007/s40279-014-0190-x
- 589 40. Emmonds S, Weaving D, Dalton-Barron N, Rennie G, Hunwicks R, Tee J, et al.

- 590 Locomotor characteristics of the women’s inaugural super league competition  
591 and the rugby league world cup. J Sports Sci. 2020;38: 1–8.  
592 doi:10.1080/02640414.2020.1790815
- 593 41. Zabaloy S, Gálvez González J, Giráldez J, Fink B, Alcaraz PE, Pereira L, et al.  
594 Changes in body composition and physical performance measures during a  
595 regular competitive season among young backs and forwards rugby players.  
596 Sport Biomech. 2022;00: 1–18. doi:10.1080/14763141.2022.2144755  
597

**TESTING POINT 1**

**TESTING POINT 2**

**TESTING POINT 3**

**End of Season**

**Start of Season**

**End of Season**

01

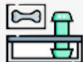

**DXA**

02

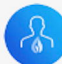

**RMR**

03

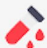

**Bloods**

04

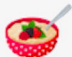

**Breakfast**

05

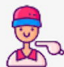

**Coaching**

06

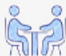

**Psychology**

07

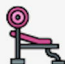

**Strength**

08

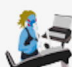

**V02 Max**
